# Supplementary material
Source: PubMed Central journal article supplement (PMC7229748)
Supplement: pnas.1921807117.sapp.pdf [file pnas.1921807117.sapp.pdf]

**Supplementary Information for**

**Title:** Evolution of a high-performance and functionally robust musculoskeletal system in salamanders

**Authors:** Stephen M. Deban, Jeffrey A. Scales, Segall V. Bloom, Charlotte M. Easterling, Mary Kate O'Donnell, and Jeffrey P. Olberding

**Corresponding author:** Stephen M. Deban

**Email:** sdeban@usf.edu.

**This PDF file includes:** Tables S1 and S2

**Table S1, part 1 of 5**

Performance and thermal robustness data for salamander taxa included in this study, with sources.

| <b>Genus</b>             | <b>Species</b>         | <b>Ballistic</b> | <b>Projection Mechanism</b> | <b>Peak Projection Velocity (m/s)</b> | <b>Peak Projection Power (W/kg)</b> | <b>Peak Retraction Velocity (m/s)</b> | <b>Peak Retraction Power (W/kg)</b> |
|--------------------------|------------------------|------------------|-----------------------------|---------------------------------------|-------------------------------------|---------------------------------------|-------------------------------------|
| <i>Ambystoma</i>         | <i>maculatum</i>       | Non              | Muscle                      | 0.62                                  | 36                                  | 0.54                                  | 35                                  |
| <i>Aneides</i>           | <i>flavipunctatus</i>  | Non              | Muscle                      | 0.20                                  | 4                                   | 0.23                                  | 6                                   |
| <i>Batrachoseps</i>      | <i>attenuatus</i>      | Ballistic        | Spring                      | 2.56                                  | 3160                                | 0.39                                  | 13                                  |
| <i>Bolitoglossa</i>      | <i>franklini</i>       | Ballistic        | Spring                      | 2.34                                  | 1800                                | 0.99                                  | 130                                 |
| <i>Chiropoterotriton</i> | <i>chondrostega</i>    | Ballistic        | Spring                      | 2.83                                  | 5315                                | 0.80                                  | 46                                  |
| <i>Desmognathus</i>      | <i>quadramaculatus</i> | Non              | Muscle                      | 0.47                                  | 22                                  | 0.74                                  | 78                                  |
| <i>Ensatina</i>          | <i>eschscholtzii</i>   | Ballistic        | Spring                      | 1.73                                  | 958                                 | 0.49                                  | 23                                  |
| <i>Eurycea</i>           | <i>guttolineata</i>    | Ballistic        | Spring                      | 1.87                                  | 1371                                | 0.48                                  | 18                                  |
| <i>Hemidactylium</i>     | <i>scutatum</i>        | Ballistic        | Spring                      | 2.34                                  | 3525                                | 0.72                                  | 33                                  |
| <i>Hydromantes</i>       | <i>platycephalus</i>   | Ballistic        | Spring                      | 3.47                                  | 2530                                | 0.68                                  | 19                                  |
| <i>Notophthalmus</i>     | <i>viridescens</i>     | Non              | Muscle                      | 0.05                                  | 0.08                                | 0.01                                  | 0.03                                |
| <i>Plethodon</i>         | <i>metcalfi</i>        | Non              | Muscle                      | 0.26                                  | 6                                   | 0.31                                  | 9                                   |
| <i>Pseudoeurycea</i>     | <i>leprosa</i>         | Ballistic        | Spring                      | 2.77                                  | 4166                                | 0.82                                  | 82                                  |
| <i>Pseudotriton</i>      | <i>ruber</i>           | Ballistic        | Spring                      | 2.76                                  | 2658                                | 1.31                                  | 191                                 |
| <i>Salamandra</i>        | <i>salamandra</i>      | Non              | Muscle                      | 0.34                                  | 9                                   | 0.56                                  | 39                                  |
| <i>Thorius</i>           | <i>macdougalli</i>     | Ballistic        | Spring                      | 3.45                                  | 11973                               | 0.48                                  | 12                                  |

Table S1, part 2 of 5

| <b>Genus</b>            | <b>Temp. of<br/>Peak<br/>Projection<br/>Velocity<br/>(°C)</b> | <b>Temp. of<br/>Peak<br/>Projection<br/>Power (°C)</b> | <b>Projection<br/>Velocity<br/>Q<sub>10</sub><br/>over 5-15°C</b> | <b>Projection<br/>Velocity<br/>Q<sub>10</sub><br/>over 10-20°C</b> | <b>Projection<br/>Velocity<br/>Q<sub>10</sub><br/>over 5-25°C</b> | <b>Projection<br/>Power<br/>Q<sub>10</sub><br/>over 5-15°C</b> | <b>Projection<br/>Power<br/>Q<sub>10</sub><br/>over 10-20°C</b> | <b>Projection<br/>Power<br/>Q<sub>10</sub><br/>over 5-25°C</b> |
|-------------------------|---------------------------------------------------------------|--------------------------------------------------------|-------------------------------------------------------------------|--------------------------------------------------------------------|-------------------------------------------------------------------|----------------------------------------------------------------|-----------------------------------------------------------------|----------------------------------------------------------------|
| <i>Ambystoma</i>        | 25                                                            | 25                                                     | 2.0                                                               | 1.8                                                                | 1.8                                                               | 7.8                                                            | 5.3                                                             | 4.4                                                            |
| <i>Aneides</i>          | 25                                                            | 20                                                     | 1.7                                                               | 1.8                                                                | 1.6                                                               | 3.7                                                            | 6.9                                                             | 3.6                                                            |
| <i>Batrachoseps</i>     | 20                                                            | 25                                                     | 1.3                                                               | 1.2                                                                | 1.2                                                               | 2.5                                                            | 1.8                                                             | 1.7                                                            |
| <i>Bolitoglossa</i>     | 25                                                            | 25                                                     | 0.9                                                               | 1.3                                                                | 1.1                                                               | 0.8                                                            | 1.9                                                             | 1.3                                                            |
| <i>Chiropetrotriton</i> | 10                                                            | 10                                                     | 1.0                                                               | 0.9                                                                | 0.9                                                               | 0.9                                                            | 0.7                                                             | 0.8                                                            |
| <i>Desmognathus</i>     | 25                                                            | 20                                                     | 2.0                                                               | 1.9                                                                | 1.7                                                               | 5.1                                                            | 4.6                                                             | 3.6                                                            |
| <i>Ensatina</i>         | 25                                                            | 25                                                     | 1.3                                                               | 1.0                                                                | 1.2                                                               | 2.1                                                            | 1.0                                                             | 1.6                                                            |
| <i>Eurycea</i>          | 25                                                            | 25                                                     | 1.4                                                               | 1.0                                                                | 1.1                                                               | 3.7                                                            | 1.3                                                             | 1.6                                                            |
| <i>Hemidactylium</i>    | 20                                                            | 15                                                     | 1.2                                                               | 1.1                                                                | 1.1                                                               | 2.2                                                            | 1.6                                                             | 1.5                                                            |
| <i>Hydromantes</i>      | 15                                                            | 25                                                     | 1.0                                                               | 0.9                                                                | 1.0                                                               | 0.9                                                            | 0.7                                                             | 1.1                                                            |
| <i>Notophthalmus</i> *  | -                                                             | -                                                      | -                                                                 | -                                                                  | -                                                                 | -                                                              | -                                                               | -                                                              |
| <i>Plethodon</i>        | 25                                                            | 25                                                     | 2.1                                                               | 1.7                                                                | 1.6                                                               | 11.2                                                           | 4.7                                                             | 4.6                                                            |
| <i>Pseudoeurycea</i>    | 25                                                            | 25                                                     | 1.2                                                               | 1.1                                                                | 1.1                                                               | 1.8                                                            | 1.6                                                             | 1.5                                                            |
| <i>Pseudotriton</i>     | 25                                                            | 15                                                     | 1.3                                                               | 1.2                                                                | 1.1                                                               | 2.0                                                            | 1.4                                                             | 1.3                                                            |
| <i>Salamandra</i>       | 25                                                            | 25                                                     | 1.5                                                               | 1.6                                                                | 1.5                                                               | 3.0                                                            | 2.8                                                             | 3.2                                                            |
| <i>Thorius</i>          | 15                                                            | 15                                                     | -                                                                 | 1.1                                                                | -                                                                 | -                                                              | 1.2                                                             | -                                                              |

\* Not tested at multiple temperatures

Table S1, part 3 of 5

| Genus                    | Temp. of<br>Peak<br>Retraction<br>Velocity<br>(°C) | Temp. of<br>Peak<br>Retraction<br>Power (°C) | Retraction<br>Velocity $Q_{10}$<br>over 5-15°C | Retraction<br>Velocity $Q_{10}$<br>over 10-20°C | Retraction<br>Velocity $Q_{10}$<br>over 5-25°C | Retraction<br>Power $Q_{10}$<br>over 5-15°C | Retraction<br>Power $Q_{10}$<br>over 10-20°C | Retraction<br>Power $Q_{10}$<br>over 5-25°C |
|--------------------------|----------------------------------------------------|----------------------------------------------|------------------------------------------------|-------------------------------------------------|------------------------------------------------|---------------------------------------------|----------------------------------------------|---------------------------------------------|
|                          | <i>Ambystoma</i>                                   | 25                                           | 25                                             | 1.9                                             | 2.1                                            | 1.8                                         | 6.17                                         | 5.00                                        |
| <i>Aneides</i>           | 25                                                 | 25                                           | 1.8                                            | 1.5                                             | 1.5                                            | 3.99                                        | 3.28                                         | 3.05                                        |
| <i>Batrachoseps</i>      | 20                                                 | 25                                           | 2.1                                            | 1.6                                             | 1.6                                            | 9.21                                        | 2.63                                         | 3.14                                        |
| <i>Bolitoglossa</i>      | 25                                                 | 25                                           | 1.9                                            | 1.7                                             | 1.6                                            | 7.46                                        | 6.75                                         | 5.18                                        |
| <i>Chiropoterotriton</i> | 20                                                 | 20                                           | 1.4                                            | 1.5                                             | 1.5                                            | 2.65                                        | 3.05                                         | 2.77                                        |
| <i>Desmognathus</i>      | 25                                                 | 25                                           | 1.6                                            | 1.8                                             | 1.6                                            | 3.16                                        | 4.54                                         | 3.37                                        |
| <i>Ensatina</i>          | 25                                                 | 25                                           | 1.7                                            | 1.7                                             | 1.7                                            | 2.65                                        | 4.04                                         | 4.73                                        |
| <i>Eurycea</i>           | 25                                                 | 25                                           | 2.2                                            | 1.7                                             | 1.7                                            | 8.93                                        | 4.67                                         | 4.54                                        |
| <i>Hemidactylium</i>     | 25                                                 | 25                                           | 2.5                                            | 1.8                                             | 1.8                                            | 8.94                                        | 3.99                                         | 4.39                                        |
| <i>Hydromantes</i>       | 25                                                 | 25                                           | 1.6                                            | 1.4                                             | 1.7                                            | 3.78                                        | 3.60                                         | 4.59                                        |
| <i>Notophthalmus</i>     | -                                                  | -                                            | -                                              | -                                               | -                                              | -                                           | -                                            | -                                           |
| <i>Plethodon</i>         | 25                                                 | 25                                           | 2.4                                            | 2.0                                             | 1.8                                            | 10.90                                       | 7.56                                         | 6.06                                        |
| <i>Pseudoeurycea</i>     | 25                                                 | 25                                           | 1.8                                            | 1.4                                             | 1.5                                            | 7.66                                        | 3.89                                         | 3.78                                        |
| <i>Pseudotriton</i>      | 25                                                 | 25                                           | 1.8                                            | 1.3                                             | 1.5                                            | 11.70                                       | 2.88                                         | 4.35                                        |
| <i>Salamandra</i>        | 25                                                 | 25                                           | 1.5                                            | 1.3                                             | 1.6                                            | 3.38                                        | 2.50                                         | 3.82                                        |
| <i>Thorius</i>           | 20                                                 | 20                                           | -                                              | 1.4                                             | -                                              | -                                           | 1.05                                         | -                                           |

**Table S1, part 4 of 5**

| <b>Genus</b>            | <b>Peak<br/>Projection<br/>Distance<br/>(mm)</b> | <b>Projection<br/>Distance<br/>Q<sub>10</sub> over<br/>5-15°C</b> | <b>Projection<br/>Distance<br/>Q<sub>10</sub> over<br/>10-20°C</b> | <b>Projection<br/>Distance<br/>Q<sub>10</sub> over<br/>5-25°C</b> | <b>Peak<br/>Projection<br/>Accel.<br/>(m/s/s)</b> | <b>Projection<br/>Accel. Q<sub>10</sub><br/>over 5-15°C</b> | <b>Projection<br/>Accel. Q<sub>10</sub><br/>over<br/>10-20°C</b> | <b>Projection<br/>Accel. Q<sub>10</sub><br/>over 5-25°C</b> |
|-------------------------|--------------------------------------------------|-------------------------------------------------------------------|--------------------------------------------------------------------|-------------------------------------------------------------------|---------------------------------------------------|-------------------------------------------------------------|------------------------------------------------------------------|-------------------------------------------------------------|
| <i>Ambystoma</i>        | 3.8                                              | 1.35                                                              | 1.07                                                               | 1.09                                                              | 90                                                | 3.53                                                        | 2.79                                                             | 2.37                                                        |
| <i>Aneides</i>          | 3.9                                              | 1.06                                                              | 1.12                                                               | 1.02                                                              | 28                                                | 2.19                                                        | 4.17                                                             | 2.21                                                        |
| <i>Batrachoseps</i>     | 4.9                                              | 0.96                                                              | 1.10                                                               | 1.05                                                              | 1802                                              | 2.04                                                        | 1.55                                                             | 1.48                                                        |
| <i>Bolitoglossa</i>     | 11.2                                             | 1.17                                                              | 1.25                                                               | 1.24                                                              | 1100                                              | 0.93                                                        | 1.51                                                             | 1.23                                                        |
| <i>Chiropterotriton</i> | 8.0                                              | 1.65                                                              | 1.15                                                               | 1.09                                                              | 2819                                              | 0.72                                                        | 0.75                                                             | 0.92                                                        |
| <i>Desmognathus</i>     | 8.6                                              | 1.07                                                              | 1.06                                                               | 1.06                                                              | 66                                                | 2.41                                                        | 2.34                                                             | 2.16                                                        |
| <i>Ensatina</i>         | 8.7                                              | 1.00                                                              | 1.14                                                               | 1.11                                                              | 842                                               | 1.59                                                        | 1.04                                                             | 1.41                                                        |
| <i>Eurycea</i>          | 7.6                                              | 1.10                                                              | 1.08                                                               | 1.18                                                              | 1018                                              | 2.59                                                        | 1.26                                                             | 1.49                                                        |
| <i>Hemidactylium</i>    | 4.7                                              | 1.12                                                              | 1.03                                                               | 1.04                                                              | 2150                                              | 1.64                                                        | 1.49                                                             | 1.35                                                        |
| <i>Hydromantes</i>      | 28.0                                             | 1.09                                                              | 0.95                                                               | 0.94                                                              | 997                                               | 0.96                                                        | 0.81                                                             | 1.03                                                        |
| <i>Notophthalmus</i>    | 2.8                                              | -                                                                 | -                                                                  | -                                                                 | 2                                                 | -                                                           | -                                                                | -                                                           |
| <i>Plethodon</i>        | 5.5                                              | 1.08                                                              | 0.94                                                               | 0.97                                                              | 35                                                | 4.98                                                        | 3.03                                                             | 2.78                                                        |
| <i>Pseudoeurycea</i>    | 8.5                                              | 1.23                                                              | 1.31                                                               | 1.21                                                              | 2181                                              | 1.40                                                        | 1.35                                                             | 1.28                                                        |
| <i>Pseudotriton</i>     | 9.9                                              | 1.20                                                              | 1.02                                                               | 1.11                                                              | 1462                                              | 1.76                                                        | 1.38                                                             | 1.25                                                        |
| <i>Salamandra</i>       | 7.2                                              | 1.09                                                              | 0.94                                                               | 1.03                                                              | 46                                                | 1.86                                                        | 1.76                                                             | 2.01                                                        |
| <i>Thorius</i>          | 4.5                                              | -                                                                 | 1.18                                                               | -                                                                 | 5276                                              | -                                                           | 1.08                                                             | -                                                           |

**Table S1, part 5 of 5**

| <b>Genus</b>            | <b>Peak Muscle Mass<br/>Specific Projection<br/>Power (W/kg)</b> | <b>Peak Muscle Mass<br/>Specific Retraction<br/>Power (W/kg)</b> | <b>Number of<br/>individuals</b> | <b>Number of<br/>feedings</b> | <b>Source</b> |
|-------------------------|------------------------------------------------------------------|------------------------------------------------------------------|----------------------------------|-------------------------------|---------------|
| <i>Ambystoma</i>        | 228                                                              | -                                                                | 6                                | 129                           | This study    |
| <i>Aneides</i>          | 10                                                               | 6.18                                                             | 4                                | 126                           | This study    |
| <i>Batrachoseps</i>     | 4200                                                             | 9.93                                                             | 8                                | 145                           | This study    |
| <i>Bolitoglossa</i>     | 1284                                                             | 37.80                                                            | 6                                | 151                           | (1)           |
| <i>Chiropterotriton</i> | 5864                                                             | 47.99                                                            | 6                                | 37                            | This study    |
| <i>Desmognathus</i>     | 82                                                               | 59.97                                                            | 6                                | 141                           | (1)           |
| <i>Ensatina</i>         | 2134                                                             | 29.70                                                            | 7                                | 179                           | (2)           |
| <i>Eurycea</i>          | 2231                                                             | 21.08                                                            | 14                               | 154                           | (3)           |
| <i>Hemidactylium</i>    | 4336                                                             | 30.42                                                            | 5                                | 107                           | This study    |
| <i>Hydromantes</i>      | 2631                                                             | -                                                                | 3                                | 63                            | (4)           |
| <i>Notophthalmus</i>    | 0.16                                                             | 0.05                                                             | 5                                | 25                            | (5)           |
| <i>Plethodon</i>        | 18                                                               | 9.45                                                             | 6                                | 138                           | (2)           |
| <i>Pseudoeurycea</i>    | 3033                                                             | 39.19                                                            | 12                               | 194                           | This study    |
| <i>Pseudotriton</i>     | 3310                                                             | 64.56                                                            | 8                                | 176                           | This study    |
| <i>Salamandra</i>       | 51                                                               | 70.69                                                            | 6                                | 141                           | This study    |
| <i>Thorius</i>          | 6765                                                             | 51.53                                                            | 4                                | 46                            | (6)           |

**Table S2, part 1 of 3**

Morphological data for salamander taxa included in this study, with sources.

| Genus                   | Species                                                           | Family         | Body        |             | N  | Inner SAR<br>Myofibers | Genioglossus muscle |
|-------------------------|-------------------------------------------------------------------|----------------|-------------|-------------|----|------------------------|---------------------|
|                         |                                                                   |                | Mass<br>(g) | SVL<br>(mm) |    |                        |                     |
| <i>Ambystoma</i>        | <i>maculatum</i>                                                  | Ambystomatidae | 11.8        | 86          | 3  | Present                | Stout               |
| <i>Aneides</i>          | <i>flavipunctatus</i>                                             | Plethodontidae | 1.4         | 40          | 4  | Present                | Stout               |
| <i>Batrachoseps</i>     | <i>attenuatus</i>                                                 | Plethodontidae | 0.6         | 42          | 15 | Absent                 | Elongated           |
| <i>Bolitoglossa</i>     | <i>franklini, dofleini</i>                                        | Plethodontidae | 3.6         | 60          | 5  | Absent                 | Absent              |
| <i>Chiropterotriton</i> | <i>chondrostega</i>                                               | Plethodontidae | 0.4         | 32          | 4  | Absent                 | Absent              |
| <i>Desmognathus</i>     | <i>marmoratus,</i><br><i>ocoee,</i><br><i>quadramaculatus</i>     | Plethodontidae | 11.2        | 84          | 11 | Present                | Stout               |
| <i>Ensatina</i>         | <i>eschscholtzii</i>                                              | Plethodontidae | 4.3         | 59          | 10 | Absent                 | Elongated           |
| <i>Eurycea</i>          | <i>guttolineata</i>                                               | Plethodontidae | 1.7         | 53          | 6  | Absent                 | Absent              |
| <i>Gyrinophilus</i>     | <i>porphyriticus</i>                                              | Plethodontidae | 5.4         | 80          | 4  | Absent                 | Absent              |
| <i>Hemidactylum</i>     | <i>scutatum</i>                                                   | Plethodontidae | 0.7         | 37          | 8  | Absent                 | Elongated           |
| <i>Hydromantes</i>      | <i>imperialis,</i><br><i>platycephalus,</i><br><i>supramontis</i> | Plethodontidae | 3.1         | 60          | 5  | Absent                 | Absent              |
| <i>Notophthalmus</i>    | <i>viridescens</i>                                                | Salamandridae  | 2.0         | 44          | 5  | Present                | Stout               |
| <i>Plethodon</i>        | <i>metcalfi</i>                                                   | Plethodontidae | 2.4         | 56          | 18 | Present                | Stout               |
| <i>Pseudoeurycea</i>    | <i>leprosa</i>                                                    | Plethodontidae | 1.7         | 48          | 8  | Absent                 | Absent              |
| <i>Pseudotriton</i>     | <i>ruber</i>                                                      | Plethodontidae | 7.5         | 75          | 18 | Absent                 | Absent              |
| <i>Salamandra</i>       | <i>salamandra</i>                                                 | Salamandridae  | 24.2        | 97          | 5  | Present                | Stout               |
| <i>Stereochilus</i>     | <i>marginatus</i>                                                 | Plethodontidae | 1.1         | 48          | 5  | Absent                 | Elongated           |
| <i>Thorius</i>          | <i>macdougalli</i>                                                | Plethodontidae | 0.1         | 21          | 8  | Absent                 | Absent              |

**Table S2, part 2 of 3**

| <b>Genus</b>            | <b>Extended<br/>Tongue<br/>Length (mm)</b> | <b>Extended<br/>Tongue<br/>Length /<br/>SVL</b> | <b>Tongue Mass<br/>(g)</b> | <b>SAR Mass<br/>(g)</b> | <b>SAR Mass /<br/>Tongue Mass</b> | <b>Tongue<br/>Skeleton<br/>Length (mm)</b> | <b>Tongue<br/>Skeleton<br/>Length /<br/>SVL</b> |
|-------------------------|--------------------------------------------|-------------------------------------------------|----------------------------|-------------------------|-----------------------------------|--------------------------------------------|-------------------------------------------------|
| <i>Ambystoma</i>        | -                                          | -                                               | 0.132                      | 0.021                   | 0.16                              | 13.8                                       | 0.16                                            |
| <i>Aneides</i>          | 7.5                                        | 0.19                                            | 0.014                      | 0.006                   | 0.39                              | 9.2                                        | 0.23                                            |
| <i>Batrachoseps</i>     | 8.2                                        | 0.20                                            | 0.003                      | 0.002                   | 0.75                              | 7.4                                        | 0.18                                            |
| <i>Bolitoglossa</i>     | 19.0                                       | 0.32                                            | 0.026                      | 0.040                   | 1.40                              | 17.1                                       | 0.29                                            |
| <i>Chiropterotriton</i> | 12.5                                       | 0.39                                            | 0.004                      | 0.003                   | 0.91                              | 8.4                                        | 0.26                                            |
| <i>Desmognathus</i>     | 7.8                                        | 0.09                                            | 0.125                      | 0.034                   | 0.27                              | 17.9                                       | 0.21                                            |
| <i>Ensatina</i>         | 14.5                                       | 0.25                                            | 0.083                      | 0.041                   | 0.47                              | 18.2                                       | 0.31                                            |
| <i>Eurycea</i>          | 14.9                                       | 0.28                                            | 0.016                      | 0.010                   | 0.61                              | 13.7                                       | 0.26                                            |
| <i>Gyrinophilus</i>     | 10.2                                       | 0.13                                            | 0.053                      | 0.023                   | 0.43                              | 12.7                                       | 0.16                                            |
| <i>Hemidactylium</i>    | 5.5                                        | 0.16                                            | 0.005                      | 0.004                   | 0.81                              | 7.9                                        | 0.22                                            |
| <i>Hydromantes</i>      | 39.5                                       | 0.66                                            | -                          | -                       | 0.96                              | 34.2                                       | 0.57                                            |
| <i>Notophthalmus</i>    | 2.5                                        | 0.06                                            | 0.009                      | 0.005                   | 0.48                              | 9.4                                        | 0.22                                            |
| <i>Plethodon</i>        | 6.7                                        | 0.11                                            | 0.031                      | 0.009                   | 0.28                              | 11.5                                       | 0.20                                            |
| <i>Pseudoeurycea</i>    | 11.8                                       | 0.24                                            | 0.011                      | 0.018                   | 1.37                              | 13.1                                       | 0.26                                            |
| <i>Pseudotriton</i>     | 9.9                                        | 0.15                                            | 0.041                      | 0.031                   | 0.73                              | 13.1                                       | 0.18                                            |
| <i>Salamandra</i>       | 6.8                                        | 0.07                                            | 0.164                      | 0.030                   | 0.18                              | 16.5                                       | 0.17                                            |
| <i>Stereochilus</i>     | 2.3                                        | 0.05                                            | 0.004                      | 0.001                   | 0.39                              | 5.8                                        | 0.12                                            |
| <i>Thorius</i>          | 5.6                                        | 0.26                                            | 0.001                      | 0.001                   | 1.77                              | 5.0                                        | 0.24                                            |



**Table S2, part 3 of 3**

| <b>Genus</b>            | <b>Epibranchial Length (mm)</b> | <b>Aponeurosis Spirality Angle (°)</b> | <b>Aponeurosis Spirality Length (mm)</b> | <b>SAR Perimeter (mm)</b> | <b>Epibranchial Aspect Ratio</b> | <b>Source</b>   |
|-------------------------|---------------------------------|----------------------------------------|------------------------------------------|---------------------------|----------------------------------|-----------------|
| <i>Ambystoma</i>        | 5.7                             | -                                      | -                                        | -                         | -                                | (7); this study |
| <i>Aneides</i>          | 3.3                             | 28                                     | 0.32                                     | 3.8                       | 2.0                              | (7)             |
| <i>Batrachoseps</i>     | 4.0                             | 130                                    | 0.50                                     | 1.9                       | 1.2                              | (7)             |
| <i>Bolitoglossa</i>     | 11.0                            | 359                                    | 2.82                                     | 4.5                       | 1.4                              | (7)             |
| <i>Chiropterotriton</i> | 4.9                             | 383                                    | 1.22                                     | 1.7                       | 1.3                              | (7)             |
| <i>Desmognathus</i>     | 6.2                             | 14                                     | 1.02                                     | 4.3                       | 2.2                              | (7)             |
| <i>Ensatina</i>         | 7.5                             | 212                                    | 1.97                                     | 4.6                       | 1.3                              | (7)             |
| <i>Eurycea</i>          | 6.9                             | 296                                    | 2.03                                     | 3.4                       | 1.3                              | (7)             |
| <i>Gyrinophilus</i>     | 5.3                             | 145                                    | 1.59                                     | 5.2                       | 1.4                              | (7)             |
| <i>Hemidactylium</i>    | 3.1                             | 116                                    | 0.65                                     | 2.7                       | 1.2                              | (7)             |
| <i>Hydromantes</i>      | 22.0                            | 198                                    | 1.57                                     | 4.0                       | 1.3                              | (4, 8)          |
| <i>Notophthalmus</i>    | 3.6                             | 6                                      | 0.19                                     | 2.8                       | 1.8                              | This study      |
| <i>Plethodon</i>        | 3.5                             | 26                                     | 0.32                                     | 2.5                       | 1.5                              | (7)             |
| <i>Pseudoeurycea</i>    | 7.8                             | 305                                    | 1.69                                     | 2.8                       | 1.2                              | (7)             |
| <i>Pseudotriton</i>     | 5.6                             | 207                                    | 2.10                                     | 5.2                       | 1.4                              | (7)             |
| <i>Salamandra</i>       | 4.9                             | 0                                      | 0.00                                     | 2.5                       | 4.4                              | (7)             |
| <i>Stereochilus</i>     | 2.0                             | 73                                     | 0.27                                     | 2.0                       | 1.1                              | (7)             |
| <i>Thorius</i>          | 2.6                             | 226                                    | 0.65                                     | 1.3                       | 1.3                              | (6, 7)          |

## References

1. J. A. Scales, C. M. Stinson, S. M. Deban, Extreme performance and functional robustness of movement are linked to muscle architecture: comparing elastic and nonelastic feeding movements in salamanders. *J. Exp. Zool. A Ecol. Genet. Physiol.* **325**, 360–376 (2016).
2. S. M. Deban, J. A. Scales, Dynamics and thermal sensitivity of ballistic and non-ballistic feeding in salamanders. *J. Exp. Biol.* **219**, 431–444 (2016).
3. C. V. Anderson, N. P. Larghi, S. M. Deban, Thermal effects on the performance, motor control and muscle dynamics of ballistic feeding in the salamander *Eurycea guttolineata*. *J. Exp. Biol.* **217**, 3146–3158 (2014).
4. S. M. Deban, J. C. Richardson, Cold-blooded snipers: thermal independence of ballistic tongue projection in the salamander *Hydromantes platycephalus*. *J. Exp. Zool. A Ecol. Genet. Physiol.* **315**, 618–630 (2011).
5. C. M. Stinson, S. M. Deban, Functional morphology of terrestrial prey capture in salamandrid salamanders. *J. Exp. Biol.* **220**, 3896–3907 (2017).
6. S. M. Deban, S. V. Bloom, Ballistic tongue projection in a miniaturized salamander. *J. Exp. Zool.* **215**, 4345 (2018).
7. J. Scales, S. V. Bloom, S. M. Deban, Convergently evolved muscle architecture enables high-performance ballistic movement in salamanders. *J. Morphol.* **281**, 196–212 (2020).
8. S. M. Deban, J. C. O'Reilly, U. Dicke, J. L. van Leeuwen, Extremely high-power tongue projection in plethodontid salamanders. *J. Exp. Biol.* **210**, 655–667 (2007).
